# Supplementary material for: Cellular inhibitor of apoptosis protein 2 promotes the epithelial-mesenchymal transition in triple-negative breast cancer cells through activation of the AKT signaling pathway
Source: PubMed Central journal article supplement (PMC5667998; doi:10.18632/oncotarget.20227), 2017-08-12
Supplement: oncotarget-08-78781-s001.pdf [file oncotarget-08-78781-s001.pdf]

## Cellular inhibitor of apoptosis protein 2 promotes the epithelial-mesenchymal transition in triple-negative breast cancer cells through activation of the AKT signaling pathway

### SUPPLEMENTARY MATERIALS

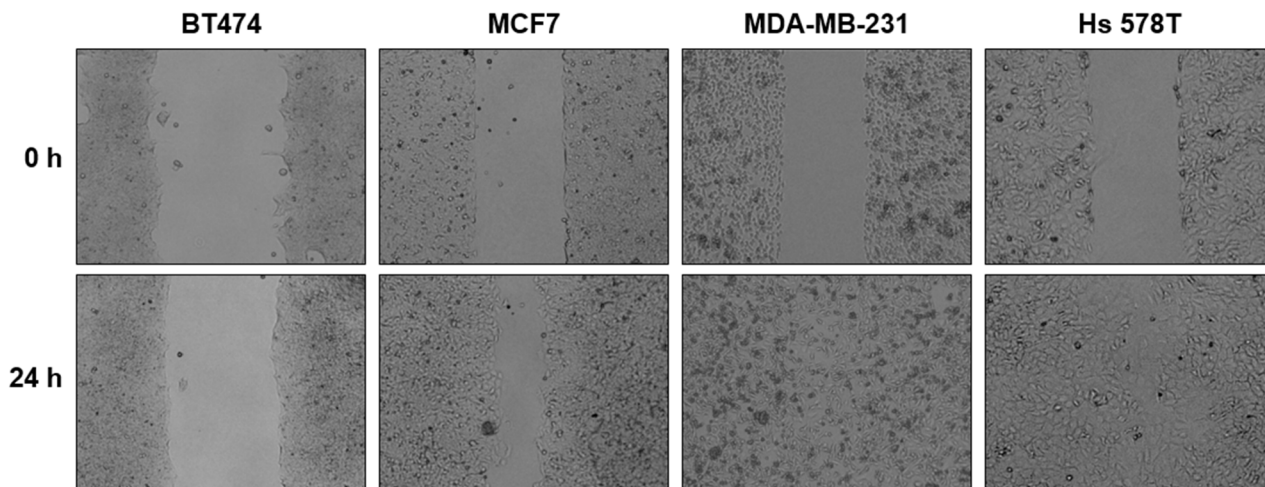

**Supplementary Figure 1: Cell motility in various breast cancer cell lines (BT474, MCF7, MDA-MB-231, Hs 578T).** Cell migration capacity was examined by wound healing assays. Images were taken at 0 and 24 h. The wound width was 500  $\mu\text{m}$  (10 $\times$  magnification).

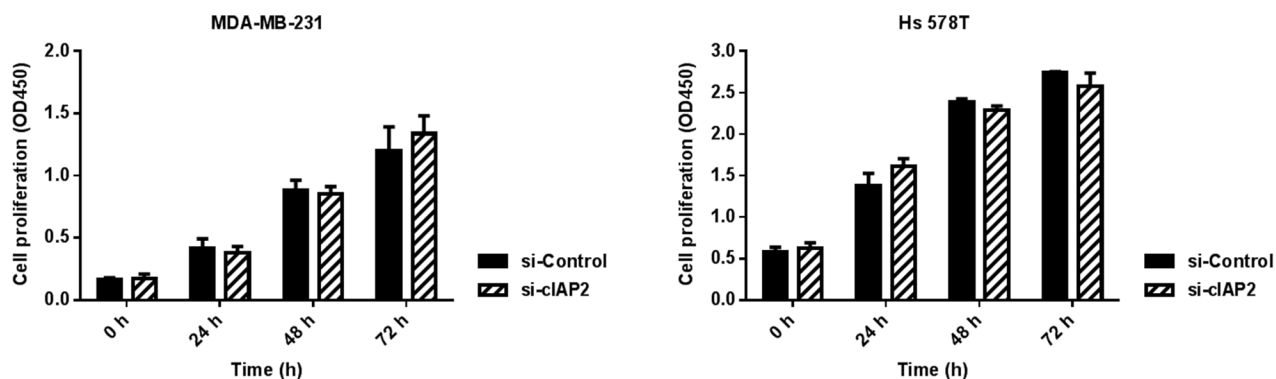

**Supplementary Figure 2: Effect of cIAP2 silencing on cell proliferation in two TNBC cell lines (MDA-MB-231 and Hs 578T).** Cell proliferation rates of the indicated cell lines were measured using a Cell Counting Kit-8 (CCK-8). Values are represented as means  $\pm$  standard deviations.

**Supplementary Table 1: Characteristics of the breast cancer cell lines used in this study**

| Cell line  | ER | PR | HER2 | Classification                   |
|------------|----|----|------|----------------------------------|
| MCF7       | +  | +  | -    | Luminal [18-20]                  |
| T-47D      | +  | +  | -    | Luminal [18-20]                  |
| BT474      | +  | +  | +    | Luminal [18-20]                  |
| SK-BR-3    | -  | -  | +    | HER2-positive <sup>[18-20]</sup> |
| MDA-MB-231 | -  | -  | -    | Triple-negative [18-20]          |
| Hs 578T    | -  | -  | -    | Triple-negative [18-20]          |

Statuses of estrogen receptor (ER), progesterone receptor (PR), and human epidermal growth factor receptor 2 (HER2)/neu as well as breast cancer subtypes are indicated based on previously published data.

**Supplementary Table 2: IHC staining scores**

| % Staining score | % Nuclei staining  |
|------------------|--------------------|
| 0                | 0%                 |
| 1                | 1–4%               |
| 2                | 5–9%               |
| 3                | 10–19%             |
| 4                | > 20%              |
| 5                | > 50%              |
| Intensity score  | Staining intensity |
| 0                | No staining        |
| 1                | Weak staining      |
| 2                | Moderate staining  |
| 3                | Strong staining    |

Quick score = % Staining score + Intensity score  
Giving a range from 0 to 8

Supplementary Table 3: Sequences of the primers used in this study

| Gene product                  | Sense                 | Antisense              |
|-------------------------------|-----------------------|------------------------|
| <i>CDH1</i> (E-cadherin)      | GTCAGTTCAGACTCCAGCCC  | AAATTCACTCTGCCCAGGACG  |
| <i>EPCAM</i> (EpCAM)          | CTCCAGAACAATGATGGGCT  | CCAGTAGGTTTCTCACTCGCTC |
| <i>CDH2</i> (N-cadherin)      | GGTGGAGGAGAAGAAGACCAG | GGCATCAGGCTCCACAGT     |
| <i>Vim</i> (vimentin)         | GTTTCCAAGCCTGACCTCAC  | GCTTCAACGGCAAAGTTCTC   |
| <i>ACTA2</i> ( $\alpha$ -SMA) | GTGAAGAAGAGGACAGCACTG | CACATACATGGCTGGGACATTG |
| <i>SNAI2</i> (Slug)           | CAAGGACACATTAGAACTCAC | GTGCAGGAGAGACATTCTGGA  |
| <i>SNAI1</i> (Snail)          | ACTTCAGTCTCTTCCTTGGAG | TGACATCTGAGTGGGTCTGG   |
| <i>BIRC1</i> (NAIP)           | CGTCCCATTGTTGCCAGT    | GATCAGTTTGGCCACTCG     |
| <i>BIRC2</i> (cIAP1)          | GTGGTGGGAAGCTCAGTAAC  | CATCATCATTGCGACCCACA   |
| <i>BIRC3</i> (cIAP2)          | AATGCTTTTGCTGTGATGGTG | GCTTGAACCTGACGGATGAAC  |
| <i>BIRC4</i> (XIAP)           | GGGGTTCAGTTTCAAGGACAT | CCACAAGGAACAAAAACGATAG |
| <i>BIRC5</i> (survivin)       | GACGACCCCATAGAGGAACAT | GCCAGAGGCCTCAATCCAT    |
| <i>BIRC6</i> (BRUCE)          | ATGTGCTTCCAACCCTCCT   | GGCTCAGTTTGATTACGC     |
| <i>BIRC7</i> (Ivlin)          | CTGGGACCCGTGGGAAGAAC  | TCCTGGGCACTTTCAGACTG   |
| <i>BIRC8</i> (ILP2)           | GAGACGGTGGACAAGTCCTA  | TTGCCACCTGTCTACCGCTT   |
| <i>GAPDH</i>                  | GATGGCATGGACTGTGGTCA  | GCAATGCCTCCTGCACCACC   |
